# 1 **A spark of 3D revisualization: new method for re-exploring** 2 **segmented data**

3

4 Yuzhi Hu<sup>1</sup>, A. Limaye<sup>2</sup>, Jing Lu<sup>3,4\*</sup>

5 <sup>1</sup>Department of Applied Mathematics, Research School of Physics, Australian National  
6 University, Canberra, ACT, Australia 2601

7 <sup>2</sup>National Computational Infrastructure, Building 143, Corner of Ward Road and Garran  
8 Road, Ward Rd, Canberra, ACT, Australia 2601

9 <sup>3</sup>Key Laboratory of Vertebrate Evolution & Human Origins of China, Institute of Vertebrate  
10 Paleontology & Paleoanthropology, Chinese Academy of Sciences, Beijing, 100044, China

11 <sup>4</sup>CAS Center for Excellence in Life & Paleoenvironment, Chinese Academy of Science,  
12 Beijing 100044, China

13

14 \*Corresponding author: [lujing@ivpp.ac.cn](mailto:lujing@ivpp.ac.cn)

15

## 16 **Abstract**

17 3D scientific visualization is a popular non-destructive investigation tool, however current  
18 imaging processing and 3D visualization software has compatibility barriers which make  
19 replicability and reproducibility in research difficult. To solve this, we developed a new  
20 revisualization method and demonstrated four case studies using three mainstream image  
21 processing and 3D visualization software. Our method offers interchangeability amongst  
22 current image processing and 3D visualization software.

23

24           Nowadays, 3D scientific visualization, becomes a common solution for many  
25 different purposes<sup>1-4</sup> and one of the most useful tools for research investigations, revealing  
26 hidden information behind the data<sup>5-8</sup>. For the last two decades, researchers in the 3D  
27 scientific visualization field have been experimenting with new ways to more accurately  
28 visualize medical and scientific data-sets<sup>3,9-17</sup>. In the current workflow of 3D scientific  
29 visualization process, 3D rendered results can be generated using combinations of image  
30 processing, segmentation, and rendering techniques<sup>18-20</sup>. Current image processing and 3D  
31 visualization software lack interchangeability and contain natural barriers due to compatibility  
32 (e.g. format protection between different software), accessibility (e.g. different researchers  
33 use different software so manageability of data sharing between collaborated parties is  
34 limited) and affordability (e.g. students may not afford the license for commercial software).  
35 The vast amount of time taken to master each software and the complexity behind different  
36 algorithms or approaches, are also a concern. These barriers weaken the achievability of the  
37 transparency, replicability and reproducibility of scientific research; damage the validation of  
38 communications between collaboration of institutions and restrict the authenticity assessment  
39 of a research finding, a proposed solution or a hypothesis.

40           It is a trend that more publishers and journals start requesting authors to upload  
41 sufficient data to support their discoveries and ensure published findings are authentic<sup>14,21-24</sup>.  
42 A common solution is uploading surface mesh data (i.e. polygon mesh, for example  
43 Stereolithography Format (.stl) or Polygon File Format (.ply)) of the segmented results of the  
44 research object. However, this approach still restricts the capability of re-investigation by  
45 peers as surface mesh data only contains external information. A more efficient and resource-  
46 friendly way is to use the segmented volume data, which contains both internal and external  
47 information together with the original volumetric data, however, as mentioned above, due to  
48 current restrictions and barriers, this is not currently feasible.

49 Most mainstream image processing and 3D visualization software (e.g. Mimics,  
50 Avizo, VG Studio) can input and output Digital Imaging and Communications in Medicine  
51 (DICOM). DICOM is well known in medicine for being exchangeable between any two  
52 entities in biomedical imaging and analysis software<sup>25</sup>. In medicine, segmented DICOM data  
53 from a scan (e.g. ultrasound or MRI) can be used to re-analysis segmented regions of interest  
54 using other software for diagnostics<sup>26,27</sup>. Thus, we developed volume exploration and  
55 presentation software *Drishti* to solve the current barriers in image processing and 3D  
56 visualization software, by implementing an ability to include both single and multiple  
57 DICOM directories of segmented volumetric data from other 3D visualization software. To  
58 the best of our knowledge, this method conquers current compatibility and interchangeability  
59 constraints among 3D visualization software.

60 By testing this new revisualization method, we use four segmented volumetric data  
61 from three mainstream 3D visualization software - Mimics, VG Studio and Avizo. The four  
62 segmented volume data have been saved as single (VG Studio) and multiple DICOM (Mimics  
63 and Avizo) directories, and then imported into *Drishti* to transform and converted into  
64 processed volume formats which *Drishti* can read and process. After proceeded to the  
65 processed volume format (i.e. .pvl.nc), segmented volume data can be explored and rendered  
66 in *Drishti* (Fig.1 and SI Figs.2-4; see SI Fig.1 for detailed work flow). Segmented structures  
67 were assigned individual colours to differentiate them (as demonstrated in Fig.1 b,d,f, and g).  
68 In *Drishti*, we use both 1D and 2D transfer functions with combinations of different  
69 illumination methods such as applying different opacity and light volumes per layer or  
70 segmented structures to revisualize the segmented volume data. Our method also allows each  
71 segmented layer of the original segmentation to be shown separately in the 2D transfer  
72 function window with its own voxel information (Fig.1 g-h). The 2D transfer function then  
73 maps the voxel information of each layer to optical properties before applying different  
74 illumination methods. Voxel intensity per layer can be read separately or together using the  
75 transfer function editor.

76           Revisualized segmented volume data can be exported in three standard formats using  
77    *Drishiti Import*: RAW, grayscale 8-bits unsigned image stacks and ITK MetaImage format,  
78    which are considered as standard formats that all image processing and 3D visualization  
79    software can read and process. Revisualized segmented volume can also be merged with  
80    original volume data for enhancement of a region-of-interest or segmented area which can  
81    validate the precision and accuracy of segmented results. To achieve this, two volumes, the  
82    revisualized segmented volume and the original tomogram need to be loaded together in  
83    *Drishiti Render*, rendered then saved as an Extensible Markup Language data file (i.e. .xml).  
84    As demonstrated, the interchangeability between different image processing and 3D  
85    visualization software is achievable with this new revisualization method. In general, this  
86    method works for any software that allows DICOM as an output format. During the  
87    revisualization process, 2D and 3D images, movies and other visuals can also be generated.  
88    All revisualized volume data can be imported directly to *Drishiti Prayog* and *Drishiti VR* for  
89    instant interactive display.

90           Our revisualization method illuminates detailed information of segmented volume  
91    data through different combination of illumination algorithms and features. It utilizes  
92    mainstream image processing and 3D visualization software; maximizes the 3D visualized  
93    outcome of any segmented volume data while maintaining the uniformity and the  
94    interoperability between different software platforms and volumetric data formats. In  
95    addition, this method is the simplest way to break current restrictions and barriers due to  
96    compatibility, accessibility and affordability issues while maintaining the capability of  
97    producing more intuitive visual representations ensuring a more efficient collaboration  
98    between parties. By introducing this new revisualization method to the community will make  
99    examining current hypotheses or re-investigating published research findings are more  
100    achievable and feasible. This revisualization method is simple enough to be generally applied  
101    to any fields.

103

## 104 **Material and methods**

105 **Segmented volume data for revisualization** Segmented volume data of the earliest  
106 tetrapodomorph, *Tungsenia paradoxa* (IVPP V10687). Original segmentation was done in  
107 Mimics<sup>28</sup>. Segmented braincase of *Erofoichthys* (IVPP OV2715) was scanned at IVPP. Both  
108 data were output as multiple zipped DICOM files from Mimics 18.0 (option: Export-Masks).

109 Segmented volume data of a Miocene bird *Linxiavis*<sup>29</sup>. Original segmentation was  
110 done in Avizo. This data was output as multiple DICOM directories from Avizo 9.0 (option:  
111 Export-DICOM).

112 Segmented volume data of lizard *Varanus indicus* (AMNH R58389) was done in VG  
113 Studio. This data was output as single DICOM directories from VG Studio 3.3 (option: Filter-  
114 Export- volume). The CT scanning of *Varanus indicus* was completed at the Microscopy and  
115 Imaging Facilities at the American Museum of Natural History (AMNH), with permissions  
116 from the Herpetology Department of the AMNH.

117 The above four experiments were then imported into *Drishti* Import for processing.

118

119 **Procession of segmented volume data** We have implemented a new ability to import  
120 multiple DICOM volume datasets and collapsing them into a single volume dataset. This was  
121 done in order to accommodate the segmentation results in the form of multiple DICOM  
122 volumes, each volume consisting of a single segmented structure. Each segmented structure  
123 is assigned a voxel value, thereby merging all the segmented datasets into a single volumetric  
124 dataset to be visualized.

125 We use two illumination methods in our revisualization experiments, the global  
126 parameters, which include the properties of the overall scene (e.g., lights, shading, camera  
127 position, projection type), and object parameters, which include the properties of the

128 segmented object (e.g., colour and opacity). Global parameters were used to operate the scene  
129 of a 3D visualization. Different mixture of parameters were used in revisualized segmented  
130 volume data (see SI Figs. 2-4).

131 **Image analysis** Images of the revisualized volume data were generated in same orientation  
132 and scale in *Drishiti* as in Mimics, Avizo and VG Studio. Image were analysed using ImageJ  
133 (<https://imagej.nih.gov/ij/index.html>) and ICY (<http://icy.bioimageanalysis.org>). Results were  
134 analysed use Microsoft Excel and displayed in the method and supplementary information.  
135 ImageJ (<https://imagej.nih.gov/ij/index.html>) and ICY (<http://icy.bioimageanalysis.org>) were  
136 used to analysis images to demonstrate their properties (Fig. 2 and SI Figs. 2-4). Images were  
137 input into both ImageJ and ICY then transformed from RGB to 8-bits greyscale images for  
138 analysis. 2D histogram of pixel intensity, 3D surface plot and edges on those images were  
139 generated per image. The 2D histogram shows the distribution of grey values in that image.  
140 The x-axis represents the possible grey values and the y-axis shows the number of pixels  
141 found for each grey value. The 3D surface plot displays a three-dimensional graph of the  
142 intensities of pixels in a 8-bits greyscale colour image. Edges were calculated using Sobel  
143 Edge Detection algorithm<sup>30</sup>. Results of these analysis are displayed here (Fig.2 and SI Figs.2-  
144 4).

145 The median optical density (OD) of each selected image (see SI Fig. 5) were  
146 measured in ImageJ for further analysis and displayed in SI Fig. 5. Calibration of optical  
147 density (SI Fig.8) was done using a Kodak No. 3 Calibrated Step Tablet scanned with an  
148 Epson Expression 1680 Professional scanner. The tablet has 21 steps with a density range of  
149 0.05 to 3.05 OD (SI Fig. 8a). A weak correlation and positive linear relationship between  
150 images of the revisualized segmented volume using *Drishiti* and images of the segmented  
151 volume in Mimics (SI Fig. 7).

152

153 **Data Availability**

154 Step-table and calibrated curve for optical density and one movie for demonstration of the  
155 suggested workflow of revisualization are available through Figshare:  
156 <https://figshare.com/s/350c258bc3d6b41313a1>.

157

### 158 **Code Availability**

159 Code is available at: <https://github.com/nci/Drishti>

160

### 161 **Acknowledgements**

162 We thank Z.L. and H.Y. for sharing their segmented volume data, AMNH with permissions  
163 for using their data, T.S., M.Z. and G.C.Y. for their continuous support. This research was  
164 funded by the Strategic Priority Research Program of the Chinese Academy of Sciences  
165 (Grant No. XDB26000000) and the National Natural Science Foundation of China  
166 (41872023). Y.H. was supported by Postgraduate Research Scholarship at the Research  
167 School of Physics, Australian National University.

168

### 169 **Author Contributions**

170 J.L. conceived the project. Y.H., A. J. and J.L. conducted functionality, unit and performance  
171 testing for *Drishti*. A.L. J.L. and Y.H. implemented the revisualization process and its  
172 corresponding illumination methods for DICOM directories. Y.H. and J.L. conducted image  
173 analysis and interpreted the results. All authors wrote the manuscript and contributed equally  
174 to this work.

175

### 176 **Competing Interests**

177 The authors declare no competing interests.

178

179 **Supplementary information**

180 Supplementary information is available to download here.

181

182 **References**

- 183 1 O'Rourke, J. C., Smyth, L., Webb, A. L. & Valter, K. How Can We Show You, If  
184 You Can't See It? Trialing the Use of an Interactive Three - Dimensional Micro - CT  
185 Model in Medical Education. *Anat. Sci. Educ.* **13**, 206–217, doi:10.1002/ase.1890  
186 (2020).
- 187 2 Tesařová, M. *et al.* An interactive and intuitive visualisation method for X-ray  
188 computed tomography data of biological samples in 3D Portable Document Format.  
189 *Sci. Rep.* **9**, 1–8, doi:http://dx.doi.org/10.1038/s41598-019-51180-2 (2019).
- 190 3 Leggio, B. *et al.* MorphoNet: an interactive online morphological browser to explore  
191 complex multi-scale data. *Nat. Commun.* **10**, 2812, doi:10.1038/s41467-019-10668-1  
192 (2019).
- 193 4 Brodlie, K. W. *et al.* *Scientific visualization: techniques and applications*. (Springer  
194 Science & Business Media, 2012).
- 195 5 Geier, B. *et al.* Spatial metabolomics of in situ host-microbe interactions at the  
196 micrometre scale. *Nat. Microbiol.* **5**, 498–510, doi:10.1038/s41564-019-0664-6  
197 (2020).
- 198 6 Johnson, E. H. & Carter, A. M. Defossilization: A Review of 3D Printing in  
199 Experimental Paleontology. *Front. Ecol. Evol.* **7**, doi:10.3389/fevo.2019.00430  
200 (2019).



- 201 7 Zhu, M. *et al.* A Silurian maxillate placoderm illuminates jaw evolution. *Science* **354**,  
202 334–336, doi:10.1126/science.aah3764 (2016).
- 203 8 Zhu, M. *et al.* A Silurian placoderm with osteichthyan-like marginal jaw bones.  
204 *Nature* **502**, 188–193, doi:10.1038/nature12617 (2013).
- 205 9 Johnson, C. Top scientific visualization research problems. *IEEE Comput. Graph.* **24**,  
206 13–17 (2004).
- 207 10 Hu, Y., Limaye, A. & Lu, J. A new tool for 3D segmentation of computed  
208 tomography data: *Drishti Paint* and its applications. Preprint at *bioRxiv*,  
209 <https://www.biorxiv.org/content/10.1101/2020.04.09.997965v2> (2020).
- 210 11 Limaye A. *Drishti*: a volume exploration and presentation tool. In: Developments in  
211 X-ray Tomography VIII 2012 Oct 17 (Vol. 8506, p. 85060X). *SPIE*, doi:  
212 10.1117/12.935640.short?SSO=1 (2012).
- 213 12 Manssour, I. H., Furuie, S. S., Olabbarriaga, S. D. & Freitas, C. M. D. S. in  
214 *Proceedings. XV Brazilian Symposium on Computer Graphics and Image Processing*.  
215 51-58 (IEEE).
- 216 13 Miyawaki, T. *et al.* Visualization and molecular characterization of whole-brain  
217 vascular networks with capillary resolution. *Nat. Commun.* **11**, 1104,  
218 doi:10.1038/s41467-020-14786-z (2020).
- 219 14 Peng, H. *et al.* Virtual finger boosts three-dimensional imaging and microsurgery as  
220 well as terabyte volume image visualization and analysis. *Nat. Commun.* **5**, 4342,  
221 doi:10.1038/ncomms5342 (2014).
- 222 15 Rueden, C. T. *et al.* ImageJ2: ImageJ for the next generation of scientific image data.  
223 *BMC Bioinformatics* **18**, 529–526, doi:10.1186/s12859-017-1934-z (2017).
- 224 16 Upson, C. *et al.* The application visualization system: A computational environment  
225 for scientific visualization. *IEEE Comput. Graph.* **9**, 30–42 (1989).

- 226 17 Yuan, J. *et al.* Tridimensional visualization reveals direct communication between the  
227 embryo and glands critical for implantation. *Nat. Commun.* **9**, 603,  
228 doi:10.1038/s41467-018-03092-4 (2018).
- 229 18 Lu, J. *et al.* A Devonian predatory fish provides insights into the early evolution of  
230 modern sarcopterygians. *Sci. Adv.* **2**, e1600154, doi:10.1126/sciadv.1600154 (2016).
- 231 19 Hu, Y., Lu, J. & Young, G. C. New findings in a 400 million-year-old Devonian  
232 placoderm shed light on jaw structure and function in basal gnathostomes. *Sci. Rep.*  
233 **7**, doi:10.1038/s41598-017-07674-y (2017).
- 234 20 Lu, J., Giles, S., Friedman, M. & Zhu, M. A new stem sarcopterygian illuminates  
235 patterns of character evolution in early bony fishes. *Nat. Commun.* **8**, 1932–1938,  
236 doi:10.1038/s41467-017-01801-z (2017).
- 237 21 Costello, M. J. Motivating Online Publication of Data. *BioScience* **59**, 418–427,  
238 doi:10.1525/bio.2009.59.5.9 (2009).
- 239 22 Penev, L. *et al.* Strategies and guidelines for scholarly publishing of biodiversity data.  
240 *RIO* **3**, e12431 (2017).
- 241 23 Federer, L. M. *et al.* Data sharing in PLOS ONE: An analysis of Data Availability  
242 Statements. *PLoS One* **13**, e0194768, doi:10.1371/journal.pone.0194768 (2018).
- 243 24 Miyakawa, T. No raw data, no science: another possible source of the reproducibility  
244 crisis. *Mol. Brain* **13**, 24, doi:10.1186/s13041-020-0552-2 (2020).
- 245 25 Peck, D. Digital Imaging and Communications in Medicine (DICOM): A Practical  
246 Introduction and Survival Guide. *J. Nucl. Med.* **50**, 1384 (2009).
- 247 26 Shiroma, J. T. An introduction to DICOM. *Vet. Med.*, 19–20 (2006).
- 248 27 Burgess, J. Digital DICOM in Dentistry. *Open Dent. J.* **9**, 330–336,  
249 doi:10.2174/1874210601509010330 (2015).
- 250 28 Lu, J. *et al.* The earliest known stem-tetrapod from the Lower Devonian of China.  
251 *Nat. Commun.* **3**, 1160, doi:10.1038/ncomms2170 (2012).

252 29 Li, Z.-H., Stidham, T.A., Deng, T., Zhou, Z.H. Evidence of Late Miocene Peri-  
253 Tibetan Aridification From the Oldest Asian Species of Sandgrouse (Aves:  
254 Pteroclididae). *Front. Ecol. Evol.* **8**, 59, doi: 10.3389/fevo.2020.00059 (2020)  
255 30 Gupta, S. & Mazumdar, S. G. Sobel edge detection algorithm. *IJCSMS* **2**, 1578–1583  
256 (2013).

257

## 258 **Figure legends**

259 **Figure 1. Segmented volume data from Mimics, Avizo and VG Studio and their**  
260 **corresponded revisualized segmented volume data from *Drishti*. a and b**, Dorsal view of  
261 the braincase of living fish *Erofoichthys* IVPP OV2715 (**a**, Image obtained from Mimics for  
262 segmented volume; **b**, image obtained from *Drishti* after revisualising of segmented volume).  
263 **c and d**, Lateral view of segmented fossil bird *Linxiavis* IVPP V241 16 (**c**, Image obtained  
264 from Avizo for segmented volume; **d**, image obtained from *Drishti* after revisualising of  
265 segmented volume). **e and f**, Lateral view of segmented lizard *Varanus indicus* (AMNH  
266 R58389) (**e**, Image obtained from VG Studio for segmented volume; **f**, image obtained from  
267 *Drishti* after revisualising of segmented volume). **g and h**, Demonstration of capability of  
268 assigning individual colours to differentiate segmented structures, allowing each segmented  
269 layer of the original segmentation to be shown separately in the 2D transfer function window  
270 with its own voxel information. Three pairs of coloured arrows indicate three separate  
271 revisualized segmented structures (**g**) and their corresponded counterparts in the 2D transfer  
272 function window (**h**).

273

274 **Figure 2. Comparison of segmented braincase of living fish *Erofoichthys* (IVPP OV2715)**  
275 **in Mimics and *Dristhi*. a-c**, Images obtained from Mimics. **a**, Original image output from  
276 Mimics. **b**, 8-bits greyscale image of **a**. **c**, Edges in **b**. **d**, 2D histogram of **b**. **e**, 3D surface plot  
277 of **b**. **f-h**, Images obtained from *Drishti* after revisualization. **f**, Original image output from

278 *Drishiti* in the same orientation and scale of **a. g**. Revisualized result corresponds to **b. h**,  
279 Revisualized result corresponds to **c. i**, 2D histogram of **g. j**, 3D surface plot of **g**. Median  
280 Optical Density (OD) of **b** and **g** is 0.549 and 0.926 respectively, calculation carried  
281 out using the calibrated curve displayed in SI Fig. 8b.

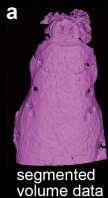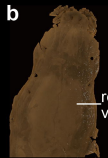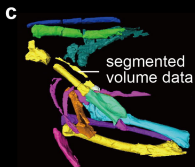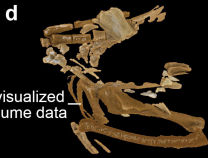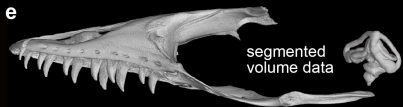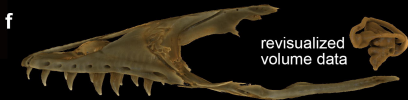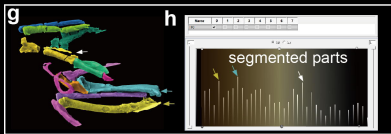

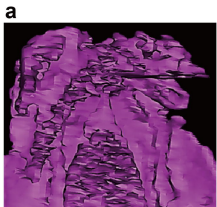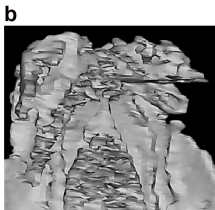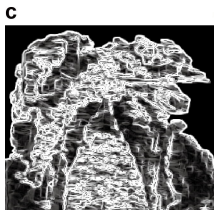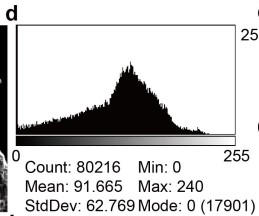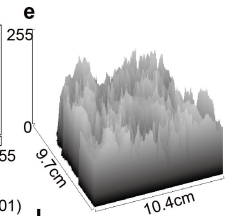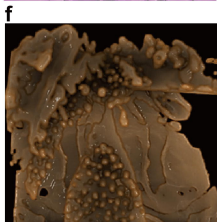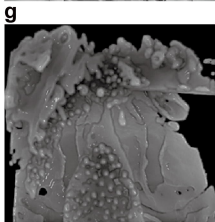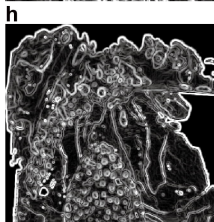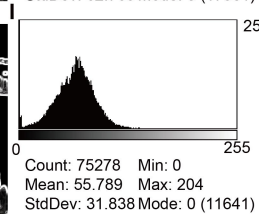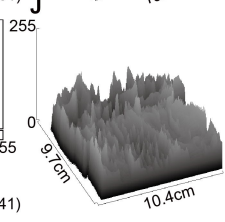

Source: http://biorxiv.org/content/10.1101/2020.08.01.222869v1.full.pdf
